# Supplementary material for: The effectiveness of emergency nurse practitioner service in the management of patients presenting to rural hospitals with chest pain: a multisite prospective longitudinal nested cohort study
Source: Springer Nature journal article supplement (doi:10.1186/s12913-017-2395-9), 2017-06-27
Supplement: MOESM1 [file 12483046]

# Managing chest pain in rural emergency departments

## Participant Questionnaire

### DEMOGRAPHICS

The first questions are general questions about you.

#### 1. What is your sex?

Male <sub>1</sub>      Female <sub>2</sub>

#### 2. What is your date of birth?

D D M M Y Y Y Y

#### 3. Do you identify as Aboriginal or Torres Strait Islander?

- Neither Aboriginal nor Torres Strait Islander..... <sub>1</sub>
- Aboriginal not Torres Strait Islander..... <sub>2</sub>
- Torres Strait Islander not Aboriginal ..... <sub>3</sub>
- Aboriginal and Torres Strait Islander ..... <sub>4</sub>

#### 4. What is your employment status?

- Employed full-time ..... <sub>1</sub>
- Employed part-time ..... <sub>2</sub>
- Unemployed ..... <sub>3</sub>
- Invalid pensioner..... <sub>4</sub>
- Aged pensioner / retired..... <sub>5</sub>
- Student ..... <sub>6</sub>
- Home Duties..... <sub>7</sub>
- Other ..... <sub>8</sub>

**5. What is the highest level of education you have achieved?**

- Did not complete primary school .....  1
- Primary school only.....  2
- No intermediate or school certificate.....  3
- Leaving or higher school certificate.....  4
- TAFE .....  5
- College.....  6
- University.....  7

**6. Which of the following health services have you used in the last year?**

|                        | GP | Community Health | Specialist medical officer | Allied Health | Nurse practitioner |
|------------------------|----|------------------|----------------------------|---------------|--------------------|
| Not at all             |    |                  |                            |               |                    |
| Once or twice          |    |                  |                            |               |                    |
| Every couple of months |    |                  |                            |               |                    |
| Once a month           |    |                  |                            |               |                    |
| More regularly         |    |                  |                            |               |                    |

**7. Do you have a regular General Practitioner?**

- Yes.....  1
- No .....  2

**8. In the past year, how many times did you go to an Emergency Department?**

.....

**9. In the past year, how many times did you stay overnight or longer in a hospital?**

.....

## CHEST PAIN MANAGEMENT

The next questions are about the chest pain that you experienced in the emergency department and how you feel the doctor or nurse practitioner managed the pain.

### 10. Did you experience any chest pain while you were being treated in the emergency department?

Yes ..... <sub>1</sub> go to Q 11

No ..... <sub>2</sub> go to Q 16

### 11. If yes, could you please indicate the severity of this pain?

Mild

Moderate

Severe

<sub>1</sub>

<sub>2</sub>

<sub>3</sub>

### 12. How long was the pain present for?

All of the time

Most of the time

Some of the time

Only occasionally

<sub>1</sub>

<sub>2</sub>

<sub>3</sub>

<sub>4</sub>

### 13. Was the doctor/nurse practitioner aware of this pain?

Yes ..... <sub>1</sub>

No ..... <sub>2</sub>

### 14. Were you offered treatment for this pain?

Yes..... <sub>1</sub> go to Q 15

No..... <sub>2</sub> go to Q 16

**15.If yes, how satisfied were you with this treatment?**

|                                       |                                       |                                       |                                       |                                       |
|---------------------------------------|---------------------------------------|---------------------------------------|---------------------------------------|---------------------------------------|
| Highly satisfied                      | Satisfied                             | Neither satisfied nor<br>dissatisfied | Dissatisfied                          | Highly unsatisfied                    |
| <input type="checkbox"/> <sub>1</sub> | <input type="checkbox"/> <sub>2</sub> | <input type="checkbox"/> <sub>3</sub> | <input type="checkbox"/> <sub>4</sub> | <input type="checkbox"/> <sub>5</sub> |

**SATISFACTION WITH EMERGENCY CARE**

The next questions are about how you feel about the care that you received for your chest pain. Please read the questions carefully, keeping in mind the care that you have just received in the emergency department. We are interested in your experiences, good and bad, about the care that you have received.

**16.Did the doctor/nurse practitioner seem informed and up-to-date about the care you were provided?**

|                                       |                                       |                                       |
|---------------------------------------|---------------------------------------|---------------------------------------|
| Yes, always                           | Yes, sometimes                        | No, never                             |
| <input type="checkbox"/> <sub>1</sub> | <input type="checkbox"/> <sub>2</sub> | <input type="checkbox"/> <sub>3</sub> |

**17.When the doctor/nurse practitioner performed a blood test, x-ray or other test, did they follow-up to give you the test results?**

|                                       |                                       |                                       |                                       |
|---------------------------------------|---------------------------------------|---------------------------------------|---------------------------------------|
| Yes, always                           | Yes, sometimes                        | No, never                             | I did not have any<br>tests           |
| <input type="checkbox"/> <sub>1</sub> | <input type="checkbox"/> <sub>2</sub> | <input type="checkbox"/> <sub>3</sub> | <input type="checkbox"/> <sub>4</sub> |

**18.Have your reasons for presenting to the emergency department been sorted out/resolved?**

|                                       |                                       |                                       |
|---------------------------------------|---------------------------------------|---------------------------------------|
| In full                               | In part                               | Not at all                            |
| <input type="checkbox"/> <sub>1</sub> | <input type="checkbox"/> <sub>2</sub> | <input type="checkbox"/> <sub>3</sub> |

If only in part or not at all, please could you tell me about this?

.....

.....

.....

.....

**19. Were you satisfied with the doctor/nurse practitioner’s treatment of your chest pain?**

|                                       |                                       |                                       |                                       |                                       |
|---------------------------------------|---------------------------------------|---------------------------------------|---------------------------------------|---------------------------------------|
| Highly satisfied                      | Satisfied                             | Neither satisfied nor<br>dissatisfied | Dissatisfied                          | Highly unsatisfied                    |
| <input type="checkbox"/> <sub>1</sub> | <input type="checkbox"/> <sub>2</sub> | <input type="checkbox"/> <sub>3</sub> | <input type="checkbox"/> <sub>4</sub> | <input type="checkbox"/> <sub>5</sub> |

**20. How often did the doctor/nurse practitioner explain things in a way that was easy to understand?**

|                                       |                                       |                                       |                                       |                                       |                                       |
|---------------------------------------|---------------------------------------|---------------------------------------|---------------------------------------|---------------------------------------|---------------------------------------|
| Never                                 | Almost never                          | Sometimes                             | Usually                               | Almost<br>always                      | Always                                |
| <input type="checkbox"/> <sub>1</sub> | <input type="checkbox"/> <sub>2</sub> | <input type="checkbox"/> <sub>3</sub> | <input type="checkbox"/> <sub>4</sub> | <input type="checkbox"/> <sub>5</sub> | <input type="checkbox"/> <sub>6</sub> |

**21. How often did the doctor/nurse practitioner listen carefully to you?**

|                                       |                                       |                                       |                                       |                                       |                                       |
|---------------------------------------|---------------------------------------|---------------------------------------|---------------------------------------|---------------------------------------|---------------------------------------|
| Never                                 | Almost never                          | Sometimes                             | Usually                               | Almost<br>always                      | Always                                |
| <input type="checkbox"/> <sub>1</sub> | <input type="checkbox"/> <sub>2</sub> | <input type="checkbox"/> <sub>3</sub> | <input type="checkbox"/> <sub>4</sub> | <input type="checkbox"/> <sub>5</sub> | <input type="checkbox"/> <sub>6</sub> |

**22. Did you feel that you could talk to the doctor/nurse practitioner easily and openly?**

|                                       |                                       |                                       |
|---------------------------------------|---------------------------------------|---------------------------------------|
| Yes, definitely                       | Yes, somewhat                         | No, definitely not                    |
| <input type="checkbox"/> <sub>1</sub> | <input type="checkbox"/> <sub>2</sub> | <input type="checkbox"/> <sub>3</sub> |

**23. Did you feel that the doctor/nurse practitioner spent enough time with you?**

Yes, definitely

<sub>1</sub>

Yes, somewhat

<sub>2</sub>

No, definitely not

<sub>3</sub>

**24. Did you feel that the doctor/nurse practitioner answered all your questions and concerns?**

Yes, definitely

<sub>1</sub>

Yes, somewhat

<sub>2</sub>

No, definitely not

<sub>3</sub>

**25. Did the doctor/nurse practitioner recommend a treatment for the chest pain?**

Yes..... <sub>1</sub> go to Q 26

No ..... <sub>2</sub> go to Q 31

**26. Did the doctor/nurse practitioner tell you in detail about the risks and side effects of the recommended treatment?**

Yes, definitely

<sub>1</sub>

Yes, somewhat

<sub>2</sub>

No, definitely not

<sub>3</sub>

**27. Did the doctor/nurse practitioner say that there was more than one treatment option to consider for your care?**

Yes..... <sub>1</sub> go to Q 28

No..... <sub>2</sub> go to Q 31

**28. When there was more than one treatment option to consider, did the doctor/nurse practitioner give you enough information about each option?**

Yes, definitely

<sub>1</sub>

Yes, somewhat

<sub>2</sub>

No, definitely not

<sub>3</sub>

**29. When there was more than one treatment option to consider, did the doctor/nurse practitioner ask which treatment you preferred?**

Yes, definitely

<sub>1</sub>

Yes, somewhat

<sub>2</sub>

No, definitely not

<sub>3</sub>

**30. Did the doctor/nurse practitioner give you the help you need to make changes in your habits or lifestyle that would improve your health or prevent illness?**

Yes, definitely

<sub>1</sub>

Yes, somewhat

<sub>2</sub>

No, definitely not

<sub>3</sub>

I do not need help with this

<sub>4</sub>

**31. Overall, how would you rate the quality of care provided by the doctor/nurse practitioner?**

Highly satisfied

<sub>1</sub>

Satisfied

<sub>2</sub>

Neither satisfied nor dissatisfied

<sub>3</sub>

Dissatisfied

<sub>4</sub>

Highly unsatisfied

<sub>5</sub>

**SF-12®**

This questionnaire asks for your views about your health. This information will help keep track of how you feel and how well you are able to do your usual activities.

For each of the following questions, please mark an  in the one box that best describes your answer.

**32. In general, would you say your health is:**

|                                       |                                       |                                       |                                       |                                       |
|---------------------------------------|---------------------------------------|---------------------------------------|---------------------------------------|---------------------------------------|
| Excellent                             | Very good                             | Good                                  | Fair                                  | Poor                                  |
| ▼                                     | ▼                                     | ▼                                     | ▼                                     | ▼                                     |
| <input type="checkbox"/> <sub>1</sub> | <input type="checkbox"/> <sub>2</sub> | <input type="checkbox"/> <sub>3</sub> | <input type="checkbox"/> <sub>4</sub> | <input type="checkbox"/> <sub>5</sub> |

**33. The following questions are about activities you might do during a typical day. Does your health now limit you in these activities? If so, how much?**

|                                                                                                                 | Yes,<br>limited<br>a lot   | Yes,<br>limited<br>a little | No, not<br>limited<br>at all |
|-----------------------------------------------------------------------------------------------------------------|----------------------------|-----------------------------|------------------------------|
|                                                                                                                 | ▼                          | ▼                           | ▼                            |
| a. <u>Moderate activities</u> , such as moving a table, pushing a vacuum cleaner, bowling, or playing golf..... | <input type="checkbox"/> 1 | <input type="checkbox"/> 2  | <input type="checkbox"/> 3   |
| b. Climbing <u>several</u> flights of stairs .....                                                              | <input type="checkbox"/> 1 | <input type="checkbox"/> 2  | <input type="checkbox"/> 3   |

**34. During the past 4 weeks, how much of the time have you had any of the following problems with your work or other regular daily activities as a result of your physical health?**

|                                                                      | All of<br>the time         | Most of<br>the time        | Some of<br>the time        | A little of<br>the time    | None of<br>the time        |
|----------------------------------------------------------------------|----------------------------|----------------------------|----------------------------|----------------------------|----------------------------|
|                                                                      | ▼                          | ▼                          | ▼                          | ▼                          | ▼                          |
| a. <u>Accomplished less</u> than you would like.....                 | <input type="checkbox"/> 1 | <input type="checkbox"/> 2 | <input type="checkbox"/> 3 | <input type="checkbox"/> 4 | <input type="checkbox"/> 5 |
| b. Were limited in the <u>kind</u> of work or other activities ..... | <input type="checkbox"/> 1 | <input type="checkbox"/> 2 | <input type="checkbox"/> 3 | <input type="checkbox"/> 4 | <input type="checkbox"/> 5 |

**35. During the past 4 weeks, how much of the time have you had any of the following problems with your work or other regular daily activities as a result of any emotional problems (such as feeling depressed or anxious)?**

|                                                                        | All of<br>the time         | Most of<br>the time        | Some of<br>the time        | A little of<br>the time    | None of<br>the time        |
|------------------------------------------------------------------------|----------------------------|----------------------------|----------------------------|----------------------------|----------------------------|
|                                                                        | ▼                          | ▼                          | ▼                          | ▼                          | ▼                          |
| a. <u>Accomplished less</u> than you would like.....                   | <input type="checkbox"/> 1 | <input type="checkbox"/> 2 | <input type="checkbox"/> 3 | <input type="checkbox"/> 4 | <input type="checkbox"/> 5 |
| b. Did work or other activities <u>less carefully than usual</u> ..... | <input type="checkbox"/> 1 | <input type="checkbox"/> 2 | <input type="checkbox"/> 3 | <input type="checkbox"/> 4 | <input type="checkbox"/> 5 |



**36. During the past 4 weeks, how much did pain interfere with your normal work (including both work outside the home and housework)?**

|                            |                            |                            |                            |                            |
|----------------------------|----------------------------|----------------------------|----------------------------|----------------------------|
| Not at all                 | A little bit               | Moderately                 | Quite a bit                | Extremely                  |
| ▼                          | ▼                          | ▼                          | ▼                          | ▼                          |
| <input type="checkbox"/> 1 | <input type="checkbox"/> 2 | <input type="checkbox"/> 3 | <input type="checkbox"/> 4 | <input type="checkbox"/> 5 |

**37. These questions are about how you feel and how things have been with you during the past 4 weeks. For each question, please give the one answer that comes closest to the way you have been feeling. How much of the time during the past 4 weeks...**

|   |                                                |                            |                            |                            |                            |
|---|------------------------------------------------|----------------------------|----------------------------|----------------------------|----------------------------|
|   | All of the time                                | Most of the time           | Some of the time           | A little of the time       | None of the time           |
|   | ▼                                              | ▼                          | ▼                          | ▼                          | ▼                          |
| a | Have you felt calm and peaceful? .....         |                            |                            |                            |                            |
|   | <input type="checkbox"/> 1                     | <input type="checkbox"/> 2 | <input type="checkbox"/> 3 | <input type="checkbox"/> 4 | <input type="checkbox"/> 5 |
| b | Did you have a lot of energy? .....            |                            |                            |                            |                            |
|   | <input type="checkbox"/> 1                     | <input type="checkbox"/> 2 | <input type="checkbox"/> 3 | <input type="checkbox"/> 4 | <input type="checkbox"/> 5 |
| c | Have you felt downhearted and depressed? ..... |                            |                            |                            |                            |
|   | <input type="checkbox"/> 1                     | <input type="checkbox"/> 2 | <input type="checkbox"/> 3 | <input type="checkbox"/> 4 | <input type="checkbox"/> 5 |

**38. During the past 4 weeks, how much of the time has your physical health or emotional problems interfered with your social activities (like visiting with friends, relatives, etc.)?**

|                            |                            |                            |                            |                            |
|----------------------------|----------------------------|----------------------------|----------------------------|----------------------------|
| All of the time            | Most of the time           | Some of the time           | A little of the time       | None of the time           |
| ▼                          | ▼                          | ▼                          | ▼                          | ▼                          |
| <input type="checkbox"/> 1 | <input type="checkbox"/> 2 | <input type="checkbox"/> 3 | <input type="checkbox"/> 4 | <input type="checkbox"/> 5 |

**YOU HAVE FINISHED. THANK YOU FOR YOUR TIME.**

Please place the questionnaire in the **supplied envelope** and return the Research Assistant who provided this questionnaire to you.
